# Supplementary material
Source: MDPI journal article supplement (https://www.mdpi.com/1999-4907/13/1/123)
Supplement: s1 [file s1]

**Effects of plant and soil characteristics on the partitioning different rainfalls  
to soil in a subtropical Chinese fir forest ecosystem**

Ying Zhang<sup>1</sup>, Beibei Zhang<sup>1</sup>, Qing Xu<sup>1\*</sup>, Deqiang Gao<sup>1</sup>, Wenbin Xu<sup>1</sup>, Ranran Ren<sup>1</sup>,  
Jing Jiang<sup>2</sup>, Silong Wang<sup>3</sup>

<sup>1</sup>Key Laboratory of Forest Ecology and Environment of National Forestry and  
Grassland Administration, Institute of Forest Ecology, Environment and Nature  
Conservation, Chinese Academy of Forestry, Beijing 100091, China.

<sup>2</sup>Department of Forest and Conservation Sciences, Faculty of Forestry, University of  
British Columbia, Vancouver BC V6T 1Z4, Canada.

<sup>3</sup>Huitong National Research Station of Forest Ecosystem, Institute of Applied  
Ecology, Chinese Academy of Sciences, Shenyang 110016, China.

**\*Corresponding author:** Dr. Qing Xu, Email address: [xuqing@caf.ac.cn](mailto:xuqing@caf.ac.cn)

## Supplementary Information

### Contents of this file:

Table S1 to S5

Figure S1

**Table S1.** Soil texture for the study site.

| Layers (cm) | Sand (%)        | Silt (%)         | Clay (%)         |
|-------------|-----------------|------------------|------------------|
| 0-20        | $8.00 \pm 2.69$ | $51.34 \pm 2.88$ | $40.65 \pm 2.90$ |
| 20-40       | $1.48 \pm 0.50$ | $52.33 \pm 3.49$ | $46.17 \pm 3.44$ |
| 40-60       | $3.08 \pm 2.13$ | $46.86 \pm 4.97$ | $50.04 \pm 3.11$ |
| 60-80       | $2.19 \pm 0.97$ | $45.49 \pm 4.16$ | $52.30 \pm 3.18$ |
| 80-100      | $1.46 \pm 0.91$ | $44.40 \pm 4.65$ | $54.13 \pm 3.86$ |

**Table S2.** Results of comparing pre-rainfall and first day after rainfall of soil water  $\delta D$ .

| Rainfall events   | Layers (cm) | PC |         | MCC |         | MCA |         |
|-------------------|-------------|----|---------|-----|---------|-----|---------|
|                   |             | df | P-value | df  | P-value | df  | P-value |
| Light rainfall    | 0-20        | 4  | <0.001  | 4   | 0.002   | 4   | 0.001   |
|                   | 20-40       | 4  | 0.003   | 4   | 0.004   | 4   | 0.002   |
|                   | 40-60       | 4  | 0.015   | 4   | 0.602   | 4   | 0.018   |
|                   | 60-80       | 4  | 0.201   | 4   | 0.394   | 4   | 0.785   |
|                   | 80-100      | 4  | 0.773   | 4   | 0.392   | 4   | 0.484   |
| Moderate rainfall | 0-20        | 4  | 0.001   | 4   | <0.001  | 4   | 0.004   |
|                   | 20-40       | 4  | 0.05    | 4   | <0.001  | 4   | 0.002   |
|                   | 40-60       | 4  | 0.014   | 4   | 0.002   | 4   | <0.001  |
|                   | 60-80       | 4  | 0.002   | 4   | 0.001   | 4   | 0.002   |
|                   | 80-100      | 4  | 0.004   | 4   | 0.001   | 4   | 0.001   |
| Heavy rainfall    | 0-20        | 4  | <0.001  | 4   | <0.001  | 4   | <0.001  |
|                   | 20-40       | 4  | <0.001  | 4   | <0.001  | 4   | <0.001  |
|                   | 40-60       | 4  | <0.001  | 4   | 0.005   | 4   | <0.001  |
|                   | 60-80       | 4  | 0.001   | 4   | <0.001  | 4   | <0.001  |
|                   | 80-100      | 4  | 0.001   | 4   | <0.001  | 4   | <0.001  |

Note: PC: pure *C. lanceolata* plantation; MCC: mixed plantation with *C. lanceolata* and *C. camphora*;

MCA: mixed plantation with *C. lanceolata* and *A. cremastogyne*.

**Table S3.** Results of comparing the contribution of rainfall to soil water among the three plantations.

| <b>Rainfall events</b> | <b>Layers (cm)</b> | <b>df</b> | <b>F-value</b> | <b>P-value</b> |
|------------------------|--------------------|-----------|----------------|----------------|
| Light rainfall         | 0-20               | 2         | 0.444          | 0.644          |
|                        | 20-40              | 2         | 0.367          | 0.694          |
|                        | 40-60              | 2         | 2.047          | 0.138          |
|                        | 60-80              | 2         | 2.047          | 0.138          |
|                        | 80-100             | 2         | 0.391          | 0.678          |
| Moderate rainfall      | 0-20               | 2         | 4.203          | 0.022          |
|                        | 20-40              | 2         | 2.518          | 0.093          |
|                        | 40-60              | 2         | 3.038          | 0.059          |
|                        | 60-80              | 2         | 8.931          | 0.001          |
|                        | 80-100             | 2         | 11.288         | 0.001          |
| Heavy rainfall         | 0-20               | 2         | 17.645         | <0.001         |
|                        | 20-40              | 2         | 15.760         | 0.001          |
|                        | 40-60              | 2         | 22.596         | <0.001         |
|                        | 60-80              | 2         | 7.938          | 0.001          |
|                        | 80-100             | 2         | 14.876         | 0.001          |

**Table S4.** Correlation coefficient between CRSW, vegetation properties and soil properties.

| Variable                                   | TB<br>(kg·m <sup>-2</sup> ) | SB<br>(g·m <sup>-2</sup> ) | HB<br>(g·m <sup>-2</sup> ) | LM<br>(t·hm <sup>-2</sup> ) | EHC<br>(t·hm <sup>-2</sup> ) | MWAR<br>(g·kg <sup>-1</sup> ·h <sup>-1</sup> ) | RB<br>(g·m <sup>-2</sup> ) | BD<br>(g·cm <sup>-3</sup> ) | TP<br>(%) | FC<br>(%) | CLRS<br>W<br>(%) | CMRS<br>W<br>(%) | CHRS<br>W (%) |
|--------------------------------------------|-----------------------------|----------------------------|----------------------------|-----------------------------|------------------------------|------------------------------------------------|----------------------------|-----------------------------|-----------|-----------|------------------|------------------|---------------|
| TB (kg·m <sup>-2</sup> )                   | 1                           | 0.874**                    | 0.634**                    | 0.777**                     | 0.828**                      | 0.733**                                        | 0.317*                     | -0.388**                    | 0.511**   | 0.549**   | 0.054            | 0.424**          | 0.397**       |
| SB (g·m <sup>-2</sup> )                    | 0.874**                     | 1                          | 0.841**                    | 0.744**                     | 0.897**                      | 0.839**                                        | 0.165                      | -0.338*                     | 0.610**   | 0.571**   | 0.005            | 0.359*           | 0.402**       |
| HB (g·m <sup>-2</sup> )                    | 0.634**                     | 0.841**                    | 1                          | 0.497**                     | 0.644**                      | 0.613**                                        | 0.015                      | -0.246                      | 0.488**   | 0.588**   | 0.012            | 0.230*           | 0.322**       |
| LM (t·hm <sup>-2</sup> )                   | 0.777**                     | 0.744**                    | 0.497**                    | 1                           | 0.821**                      | 0.767**                                        | 0.272                      | -0.278                      | 0.439**   | 0.476**   | 0.065            | 0.414*           | 0.393*        |
| EHC (t·hm <sup>-2</sup> )                  | 0.828**                     | 0.897**                    | 0.644**                    | 0.821**                     | 1                            | 0.984**                                        | 0.243                      | -0.297*                     | 0.530**   | 0.479**   | 0.035            | 0.367*           | 0.370*        |
| MWAR(g·kg <sup>-1</sup> ·h <sup>-1</sup> ) | 0.733**                     | 0.839**                    | 0.613**                    | 0.767**                     | 0.984**                      | 1                                              | 0.217                      | -0.241                      | 0.488**   | 0.410**   | 0.027            | 0.278            | 0.301*        |
| RB (g·m <sup>-2</sup> )                    | 0.317*                      | 0.165                      | 0.015                      | 0.272                       | 0.243                        | 0.217                                          | 1                          | 0.541**                     | 0.477**   | 0.311*    | 0.609**          | 0.665**          | 0.612**       |
| BD (g·cm <sup>-3</sup> )                   | -0.388**                    | -0.338*                    | -0.246                     | -0.278                      | -0.297*                      | -0.241                                         | 0.541**                    | 1                           | -0.600**  | -0.489**  | -0.829**         | -0.894**         | -0.898**      |
| TP (%)                                     | 0.511**                     | 0.610**                    | 0.488**                    | 0.439**                     | 0.530**                      | 0.488**                                        | 0.477**                    | -0.600**                    | 1         | 0.679**   | 0.394**          | 0.556**          | 0.636**       |
| FC (%)                                     | 0.549**                     | 0.571**                    | 0.588**                    | 0.476**                     | 0.479**                      | 0.410**                                        | 0.311*                     | -0.489**                    | 0.679**   | 1         | 0.304*           | 0.508**          | 0.594**       |
| CLRSW (%)                                  | 0.054                       | 0.005                      | -0.012                     | 0.065                       | 0.035                        | 0.027                                          | 0.609**                    | -0.829**                    | 0.394**   | 0.304*    | 1                | 0.898**          | 0.869**       |
| CMRSW (%)                                  | 0.424**                     | 0.359*                     | 0.230*                     | 0.414**                     | 0.367*                       | 0.278                                          | 0.665**                    | -0.894**                    | 0.556**   | 0.508**   | 0.898**          | 1                | 0.911**       |
| CHRSW (%)                                  | 0.397**                     | 0.402**                    | 0.322*                     | 0.393*                      | 0.370**                      | 0.301*                                         | 0.612**                    | -0.898**                    | 0.636**   | 0.594**   | 0.869**          | 0.911**          | 1             |

Note: TB: tree biomass; SB: shrub biomass; HB: herb biomass; LM: litter mass; EHC: Effective holding

capacity; MWAR: Maximum water absorption rate; BD: bulk density; TP: total porosity; FC: field

capacity; CLRSW: the contribution of light rainfall to soil water; CMRSW: the contribution of

moderate rainfall to soil water; CHRSW: the contribution of heavy rainfall to soil water; \*: p<0.05; \*\*:

p<0.01.

**Table S5.** Soil organic carbon concentration (g/kg) among the three plantations.

| Layers (cm) | PC          | MCC          | MCA         |
|-------------|-------------|--------------|-------------|
| 0-20        | 11.21±0.70b | 13.80±1.11a  | 14.68±0.30a |
| 20-40       | 9.42±0.23a  | 10.34±0.94ab | 10.84±0.50a |
| 40-60       | 5.21±0.63a  | 5.62±0.36a   | 5.87±0.35a  |
| 60-80       | 4.40±1.11a  | 5.28±1.51a   | 5.30±0.57a  |
| 80-100      | 2.49±0.30b  | 3.10±0.28a   | 2.92±0.25ab |

Note: PC: pure *C. lanceolata* plantation; MCC: mixed plantation with *C. lanceolata* and *C. camphora*;

MCA: mixed plantation with *C. lanceolata* and *A. cremastogyne*.

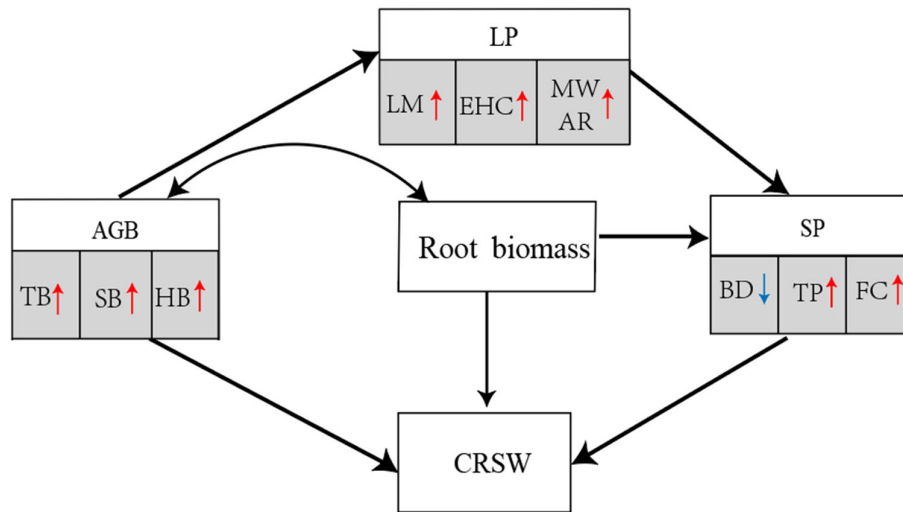

**Figure S1** A priori model of variables on the contribution of rainfall to soil water (CRSW). The double-layered rectangle represents the first principal component of the principal component analysis (PCA) for above-ground biomass, litter and soil properties. Above-ground biomass includes TB (tree biomass), SB (shrub biomass), and HB (herb biomass). Litter properties include LM (litter mass), EHC (Effective holding capacity) and MWAR (Maximum water absorption rate). Soil properties include BD (bulk density), TP (total porosity) and FC (field capacity); CRSW: the contribution of rainfall to soil water.
